# Supplementary material for: Three-in-one: information encryption, anti-counterfeiting and LD-tracking of multifunctional purine derivatives
Source: Royal Society of Chemistry journal article supplement (doi:10.1039/d0tc05221c), 2021-01-01
Supplement: d0tc05221c1.pdf [file d0tc05221c1.pdf]

*Supporting Information for*

**Three-in-One: information encryption, anti-counterfeiting  
and LDs-tracking of multifunctional purine derivatives**

Hao-Yuan Wang<sup>a</sup>, Kang-Kang Yu<sup>a,b\*</sup>, Chong-Yun Tan<sup>a</sup>, Kun Li<sup>a</sup>, Yan-Hong Liu<sup>a</sup>, Lei  
Shi<sup>a</sup>, Kai Lu<sup>a</sup>, Xiao-Qi Yu<sup>a\*</sup>

<sup>a</sup> Key Laboratory of Green Chemistry and Technology (Ministry of Education), College  
of Chemistry, Sichuan University, Chengdu, 610064, China.

Email: xqyu@scu.edu.cn

<sup>b</sup> Key Laboratory of Bio-resources and Eco-environment (Ministry of Education),  
College of Life Sciences, Sichuan University, Chengdu, 610064, China.

E-mail: kangkangyu@scu.edu.cn

## Experimental Section

### Reaction procedures<sup>1,2</sup>

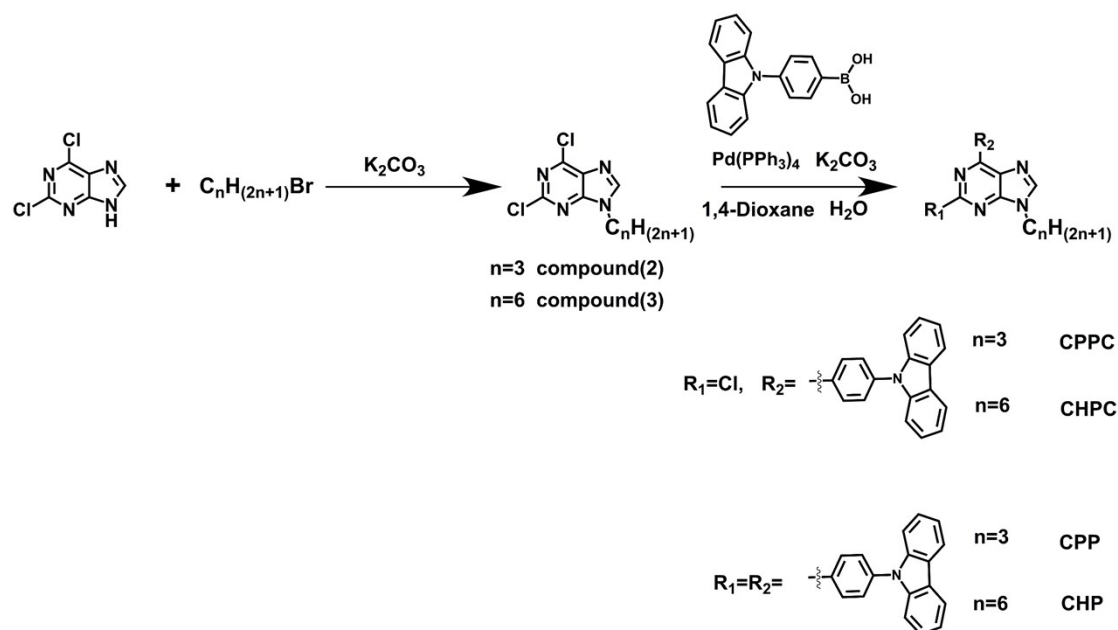

**Scheme S1.** The synthetic routes for **CPPC**, **CHPC**, **CPP** and **CHP**

#### 2,6-dichloro-9-hexyl-9H-purine (**3**)

**Compound 3** was produced using the same procedure as **compound 2** by changing the 1-bromopropane as 1-Bromohexane. Compound 3 was obtained as white solid in 70% yield. <sup>1</sup>H NMR (400 MHz, CDCl<sub>3</sub>): δ (TMS, ppm) 8.09 (s, 1H, a-H), 4.22 (t, J = 7.3 Hz, 2H, b-H), 1.86 (m, 2H, c-H), 1.26 (s, 6H, (d-f)-H), 0.81 (t, J = 6.8 Hz, 3H, g-H). HRMS (ESI): m/z: Calcd for C<sub>11</sub>H<sub>15</sub>C<sub>2</sub>N<sub>4</sub><sup>+</sup>: 273.0674 [M+H]<sup>+</sup>; Found: 273.0628.

#### 9-(4-(2-chloro-9-hexyl-9H-purin-6-yl)phenyl)-9H-carbazole (**CHPC**)

The synthesis and purification of **CHPC** were similar to that of **CPPC** but with **Compound 2** instead of **Compound 3**. Compound **CHPC** was obtained as a yellowish solid in 70 % yield. <sup>1</sup>H NMR (400 MHz, CDCl<sub>3</sub>): δ (TMS, ppm) 9.03 (d, J = 8.8 Hz,

2H, j, k-H or l, m-H), 8.14 (d, J = 7.2 Hz, 2H, h-H and i-H), 8.13 (s, 1H, a-H), 7.79 (d, J = 8.9 Hz, 2H, j, k-H or l, m-H), 7.53 (d, J = 8.2 Hz, 2H, n-H and o-H), 7.44-7.40 (m, 2H, q-H and p-H), 7.32-7.28 (m, 2H, r-H and s-H), 4.30 (t, J = 7.3 Hz, 2H, b-H), 1.95 (m, 2H, c-H), 1.35 (m, 6H, (c-f)-H), 0.91-0.85 (m, 3H, g-H). <sup>13</sup>C NMR (100 MHz, CDCl<sub>3</sub>): δ (TMS, ppm) 155.46, 154.31, 154.24, 145.07, 140.73, 140.34, 133.21, 131.63, 130.10, 126.74, 126.12, 123.69, 120.37, 109.92, 44.20, 31.16, 29.81, 26.31, 22.46, 13.96. HRMS (ESI): m/z: Calcd for C<sub>29</sub>H<sub>27</sub>ClN<sub>5</sub><sup>+</sup>: 480.1955 [M+H]<sup>+</sup>; Found: 480.1955.

9,9'-((9-propyl-9H-purine-2,6-diyl)bis(4,1-phenylene))bis(9H-carbazole) (**CPP**)

The synthesis and purification of **CPP** were similar to that of **CPPC**, but the input proportion of Compound **2** and (4-(9H-Carbazol-9-yl)phenyl)boronic acid was change from 1.2:1 to 1:2.2. Compound **CPP** was obtained as a white solid in 49 % yield. <sup>1</sup>H NMR (400 MHz, CDCl<sub>3</sub>): δ (TMS, ppm) 9.22 (d, J = 8.6 Hz, 2H, g<sub>1</sub>-j<sub>1</sub>-H or g<sub>2</sub>-j<sub>2</sub>-H), 8.94 (d, J = 8.5 Hz, 2H, g<sub>1</sub>-j<sub>1</sub>-H or g<sub>2</sub>-j<sub>2</sub>-H), 8.19 (s, 1H, a-H), 8.16 (d, J = 7.8 Hz, 4H, e<sub>1</sub>-H, e<sub>2</sub>-H, f<sub>1</sub>-H and f<sub>2</sub>-H), 7.84 (d, J = 8.6 Hz, 2H, g<sub>1</sub>-j<sub>1</sub>-H or g<sub>2</sub>-j<sub>2</sub>-H), 7.76 (d, J = 8.5 Hz, 2H, g<sub>1</sub>-j<sub>1</sub>-H or g<sub>2</sub>-j<sub>2</sub>-H), 7.59-7.53 (m, 4H, k<sub>1</sub>-H, k<sub>2</sub>-H, l<sub>1</sub>-H, and l<sub>2</sub>-H), 7.44 (d, J = 15.4 Hz, 4H, m<sub>1</sub>-H, m<sub>2</sub>-H, n<sub>1</sub>-H and n<sub>2</sub>-H), 7.31 (t, J = 7.5 Hz, 4H, o<sub>1</sub>-H, o<sub>2</sub>-H, p<sub>1</sub>-H and p<sub>2</sub>-H), 4.42 (d, J = 7.1 Hz, 2H, b-H), 2.11 (q, J = 7.3 Hz, 2H, c-H), 1.08 (t, J = 7.4 Hz, 3H, d-H). <sup>13</sup>C NMR (100 MHz, CDCl<sub>3</sub>): δ (TMS, ppm) 157.90, 153.76, 153.34, 144.81, 140.65, 140.51, 140.04, 139.33, 137.30, 134.91, 131.39, 129.95, 129.88, 126.82, 126.07, 126.01, 123.62, 123.53, 120.35, 120.22, 120.09, 109.97, 109.91, 45.65, 23.35, 11.40. HRMS (ESI): m/z: Calcd for C<sub>44</sub>H<sub>33</sub>N<sub>6</sub><sup>+</sup>: 645.2767 [M+H]<sup>+</sup>; Found: 645.2725.

### 9,9'-((9-propyl-9H-purine-2,6-diyl)bis(4,1-phenylene))bis(9H-carbazole) (**CHP**)

The synthesis and purification of **CHP** were similar to that of **CPP**, but with Compound **2** instead of Compound **3**. Compound **CHP** was obtained as a white solid in 63 % yield. <sup>1</sup>H NMR (400 MHz, CDCl<sub>3</sub>): δ (TMS, ppm) 9.23 (d, J = 8.6 Hz, 2H, j<sub>1</sub>-m<sub>1</sub> or j<sub>2</sub>-m<sub>2</sub>), 8.94 (d, J = 8.6 Hz, 2H, j<sub>1</sub>-m<sub>1</sub> or j<sub>2</sub>-m<sub>2</sub>), 8.18-8.16 (m, 5H, i<sub>1</sub>-H, i<sub>2</sub>-H, h<sub>1</sub>-H, h<sub>2</sub>-H and a-H (8.17)), 7.85 (d, J = 8.6 Hz, 2H, j<sub>1</sub>-m<sub>1</sub> or j<sub>2</sub>-m<sub>2</sub>), 7.77 (d, J = 8.6 Hz, 2H, j<sub>1</sub>-m<sub>1</sub> or j<sub>2</sub>-m<sub>2</sub>), 7.59-7.54 (m, 4H, o<sub>1</sub>-H, o<sub>2</sub>-H, n<sub>1</sub>-H and n<sub>2</sub>-H), 7.46-7.42 (m, 4H, p<sub>1</sub>-H, p<sub>2</sub>-H, q<sub>1</sub>-H and q<sub>2</sub>-H), 7.33-7.30 (m, 4H, r<sub>1</sub>-H, r<sub>2</sub>-H, s<sub>1</sub>-H and s<sub>2</sub>-H), 4.42 (t, J = 7.2 Hz, 2H, b-H), 2.06 (m, 2H, c-H), 1.46-1.31 (m, 6H, (d-f)-H), 0.91 (t, J = 7.1 Hz, 3H, g-H). <sup>13</sup>C NMR (100 MHz, CDCl<sub>3</sub>): δ (TMS, ppm) 1157.89, 153.74, 153.33, 144.79, 140.66, 140.52, 140.04, 139.34, 137.31, 134.93, 131.40, 129.94, 129.89, 126.83, 126.09, 126.03, 123.63, 123.54, 120.37, 120.24, 120.10, 109.98, 109.93, 43.95, 31.22, 29.93, 26.42, 22.52, 14.02. HRMS (ESI): m/z: Calcd for C<sub>47</sub>H<sub>39</sub>N<sub>6</sub><sup>+</sup>: 687.3236 [M+H]<sup>+</sup>; Found: 687.3222.

### Information encryption process

A clean 96-well plate was used for demonstrating the encryption scheme. For example, to paint the encrypted message "SCU" on the plate, the selected wells were injected with 200 μL of ethanol (solution I). Then, remaining wells were injected with 200 μL of water (solution II) to achieve information encryption. When all wells were injected with 0.2 μL compound solution (5mM, DMF), and the plate was gently shaken, the information was displayed in 365 UV light.

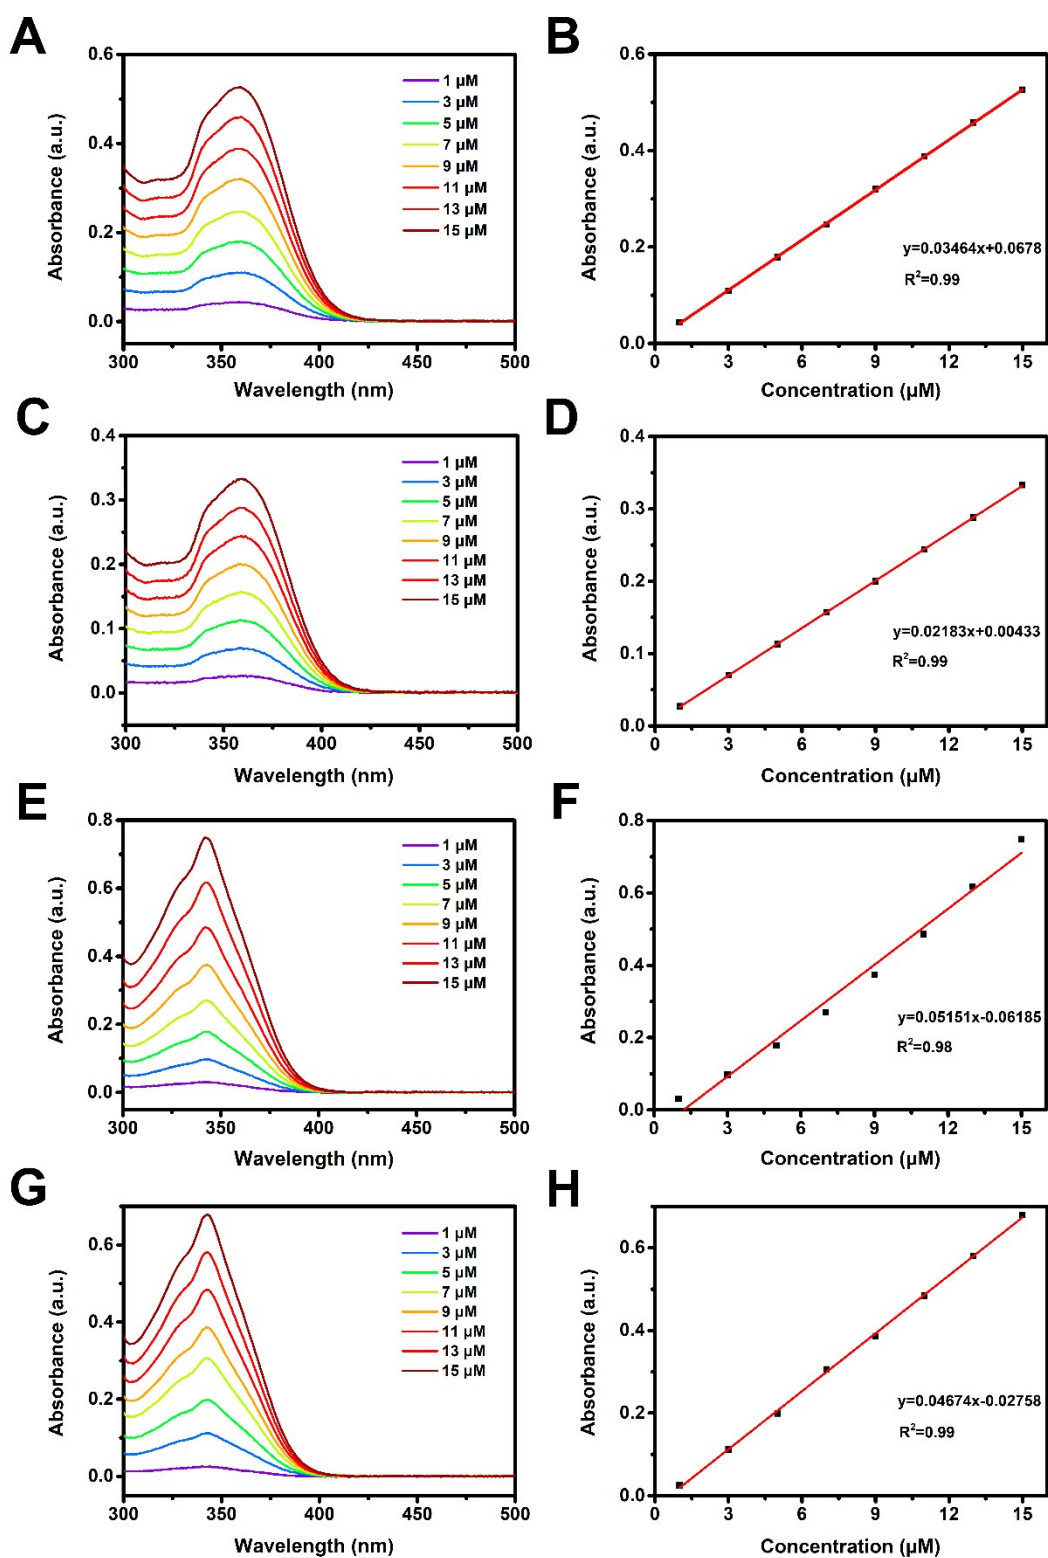

**Fig. S1.** UV spectra of compound **CPPC** (A), **CHPC** (C), **CPP** (E), **CHP** (G) at different concentrations (1, 3, 5, 7, 9, 11, 13, 15  $\mu\text{M}$ ); Absorption-concentration curve of compound **CPPC**(B), **CHPC** (D), **CPP**(F), **CHP**(H).

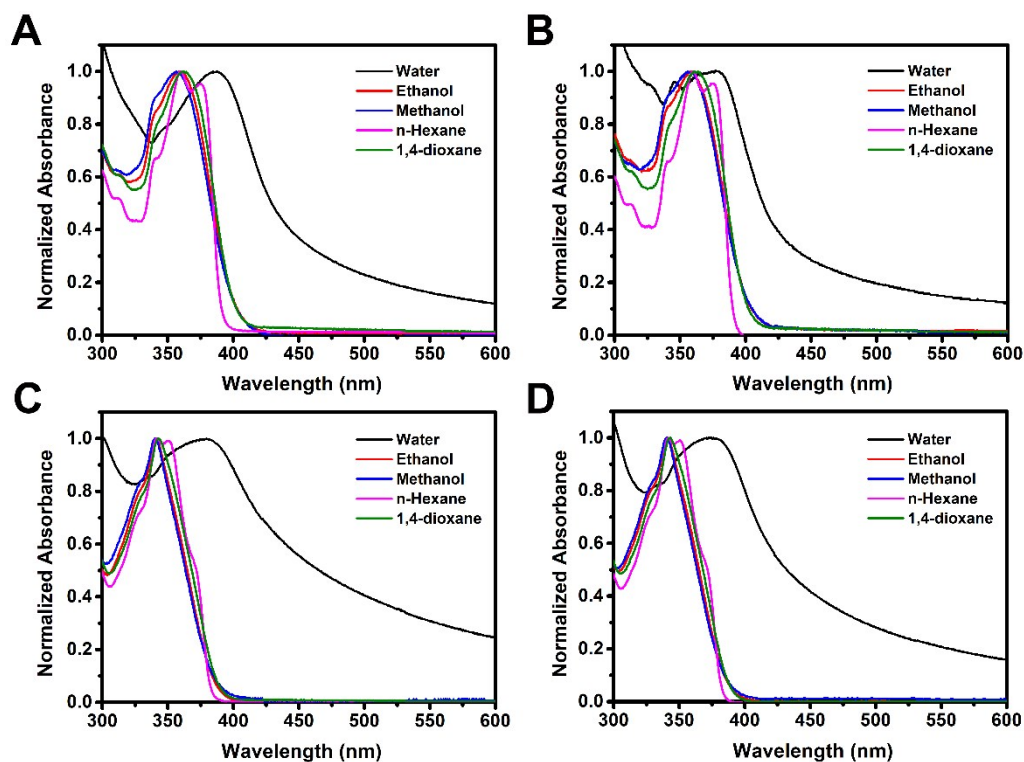

Fig. S2. Absorption spectra of CPPC(A), CHPC(B), CPP(C), CHP(D) in different

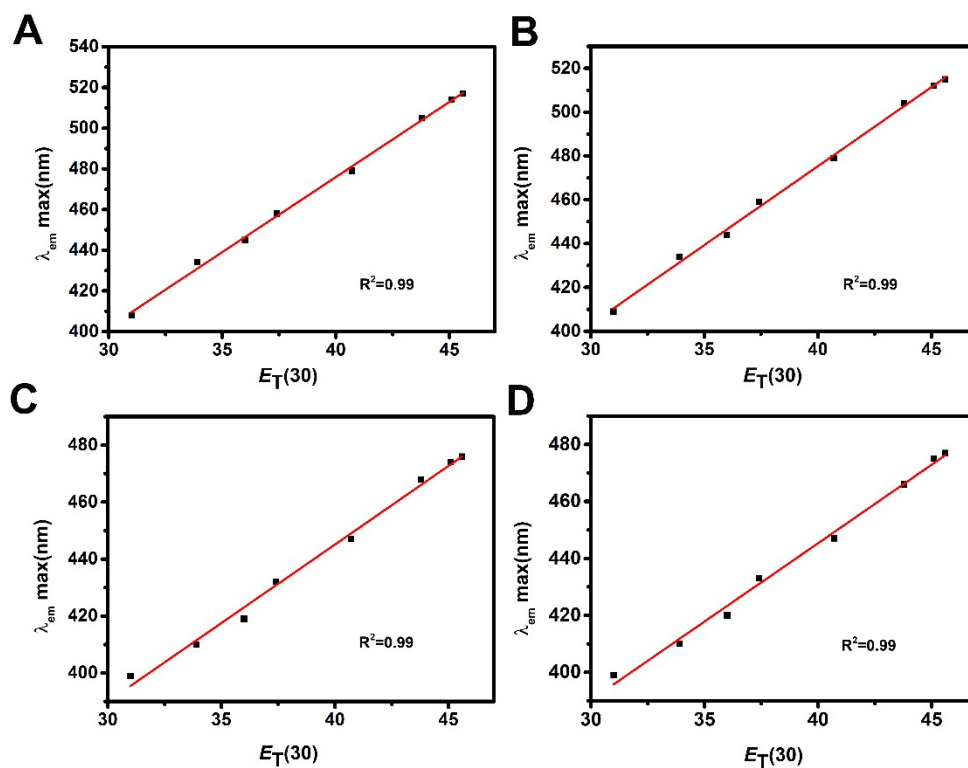

solvents.

Fig. S3. Linear relationship between the maximum emission wavelength and the

solvent's polarity **CPPC(A)**, **CHPC(B)**, **CPP(C)**, **CHP(D)**.

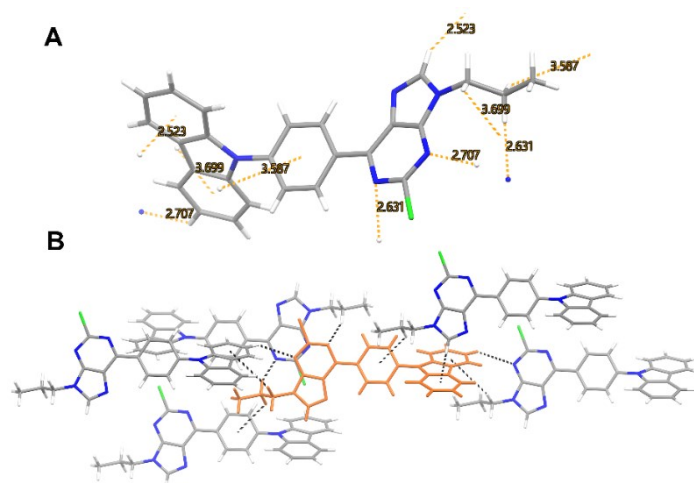

**Fig. S4.** The detailed intermolecular interactions in **CPPC** crystal.

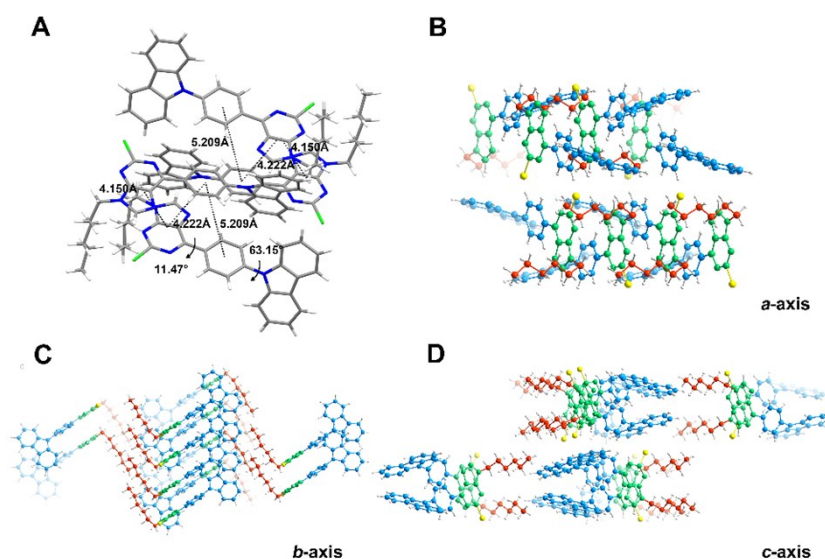

**Fig. S5.** Single-crystal structure (A) and molecular stacking in **CHPC** single crystal in different views: (B) *a*-axis, (C) *c*-axis, and (D) *b*-axis. The blue parts are carbazole groups, the red parts are alkyl chains, and green parts are purine unit.

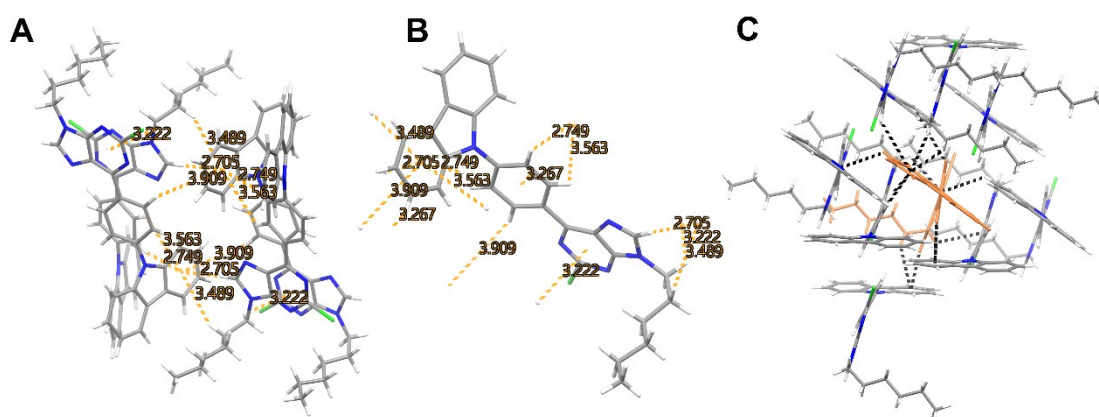

**Fig. S6.** The detailed intermolecular interactions in **CHPC** crystal.

**Table S1.** The intermolecular hydrogen bonds data in entire packing modes of the **CPPC** crystal.

| Type of interaction | Amount | d/Å   |
|---------------------|--------|-------|
| C-H... $\pi$        | 2      | 2.523 |
|                     | 2      | 3.587 |
|                     | 2      | 3.699 |
| C-H...N             | 2      | 2.631 |
|                     | 2      | 2.707 |



**Table S2.** The intermolecular hydrogen bonds data in entire packing modes of the **CHPC** crystal.

| Type of interaction | Amount | d/Å   |
|---------------------|--------|-------|
| C-H... $\pi$        | 2      | 2.705 |
|                     | 2      | 2.749 |
|                     | 2      | 3.222 |
|                     | 2      | 3.267 |
|                     | 2      | 3.489 |
|                     | 2      | 3.563 |
|                     | 2      | 3.909 |

**Table S3** Crystal data and structure refinement of **CPPC** and **CHPC**.

| Compound                              | <b>CPPC</b>                                      | <b>CHPC</b>                                      |
|---------------------------------------|--------------------------------------------------|--------------------------------------------------|
| Formula                               | C <sub>26</sub> H <sub>20</sub> ClN <sub>5</sub> | C <sub>29</sub> H <sub>26</sub> ClN <sub>5</sub> |
| $D_{\text{calc.}} / \text{g cm}^{-3}$ | 1.395                                            | 1.290                                            |
| $\mu / \text{mm}^{-1}$                | 1.814                                            | 1.574                                            |
| Size/mm <sup>3</sup>                  | 0.20×0.15×0.10                                   | 0.15×0.2×0.2                                     |
| T/K                                   | 150                                              | 150                                              |
| Crystal System                        | triclinic                                        | monoclinic                                       |
| Space Group                           | <i>P</i> -1                                      | P 1 21/c 1                                       |
| $a / \text{Å}$                        | 8.9375(3)                                        | 17.2831(14)                                      |

|                                                                               |                                                      |                                                      |
|-------------------------------------------------------------------------------|------------------------------------------------------|------------------------------------------------------|
| $b/\text{\AA}$                                                                | 10.2919(3)                                           | 17.2445(12)                                          |
| $c/\text{\AA}$                                                                | 11.4557(4)                                           | 8.2948(7)                                            |
| $\alpha/^\circ$                                                               | 89.084(2)                                            | 90                                                   |
| $\beta/^\circ$                                                                | 88.820(2)                                            | 90.889(6)                                            |
| $\gamma/^\circ$                                                               | 81.768(2)                                            | 90                                                   |
| $V/\text{\AA}^3$                                                              | 1042.57(6)                                           | 2471.9(3)                                            |
| F(000)                                                                        | 456.0                                                | 1008.0                                               |
| Z                                                                             | 2                                                    | 4                                                    |
| Measured Refl's.                                                              | 20436                                                | 25763                                                |
| <i>Indep't Refl's</i>                                                         | 4238                                                 | 4862                                                 |
| $R_{int}$                                                                     | 0.0554                                               | 0.1616                                               |
| <i>Parameters</i>                                                             | 290                                                  | 317                                                  |
| <i>Restraints</i>                                                             | 0                                                    | 0                                                    |
| <i>GooF</i>                                                                   | 1.038                                                | 1.020                                                |
| Final R indexes [ $I \geq 2\sigma$<br>(I)]wR <sub>2</sub> ( <i>all data</i> ) | R <sub>1</sub> = 0.0400,<br>wR <sub>2</sub> = 0.0934 | R <sub>1</sub> = 0.1128,<br>wR <sub>2</sub> = 0.2836 |
| Final R indexes [all data]                                                    | R <sub>1</sub> = 0.0534, wR <sub>2</sub> = 0.1014    | R <sub>1</sub> = 0.1540, wR <sub>2</sub> = 0.3488    |
| CCDC                                                                          | 2026792                                              | 2015608                                              |

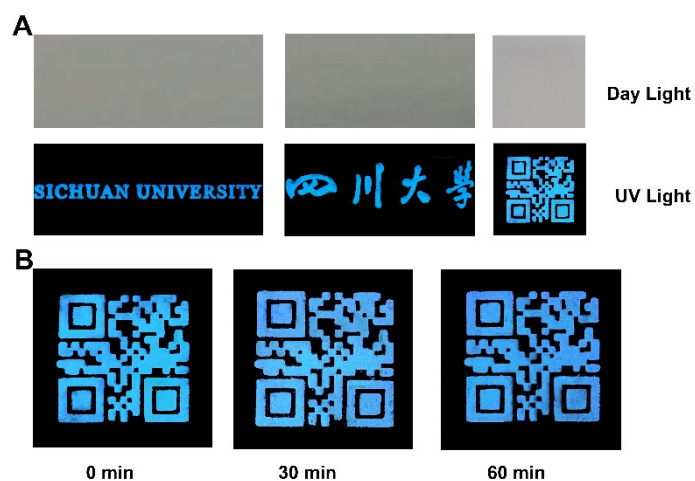

**Fig. S7.** Anti-counterfeiting protection applications of the **CHPC** compound-based ink. (A) the stamped bilingual logo of school under 365 nm UV lamp, (B) the tamped QR codes under visible light and UV light (365 nm), and irradiated continuously for different time.

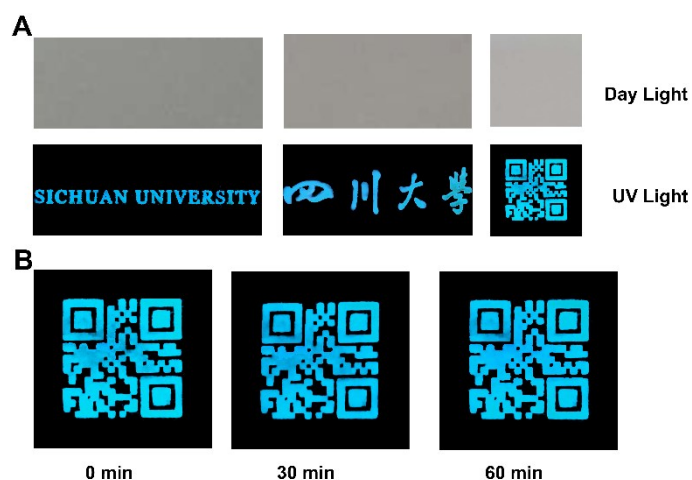

**Fig. S8** Anti-counterfeiting protection applications of the **CPP** compound-based ink. (A) the stamped bilingual logo of school under 365 nm UV lamp, (B) the tamped QR codes under visible light and UV light (365 nm), and irradiated continuously for different time.

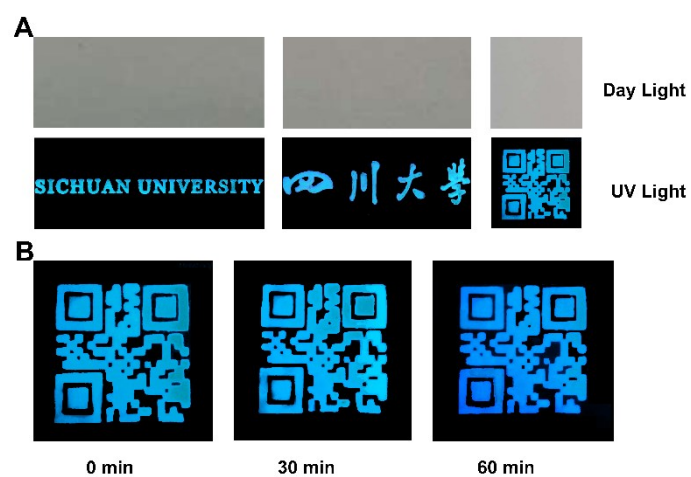

**Fig. S9.** Anti-counterfeiting protection applications of the **CHP** compound-based ink.

(A) the stamped bilingual logo of school under 365 nm UV lamp, (B) the tamped QR codes under visible light and UV light (365 nm), and irradiated continuously for different time.

**Table S4** The ClogP values of all compounds.

| Compound | CPPC | CHPC | CPP   | CHP   |
|----------|------|------|-------|-------|
| ClogP    | 7.38 | 8.97 | 12.72 | 14.31 |

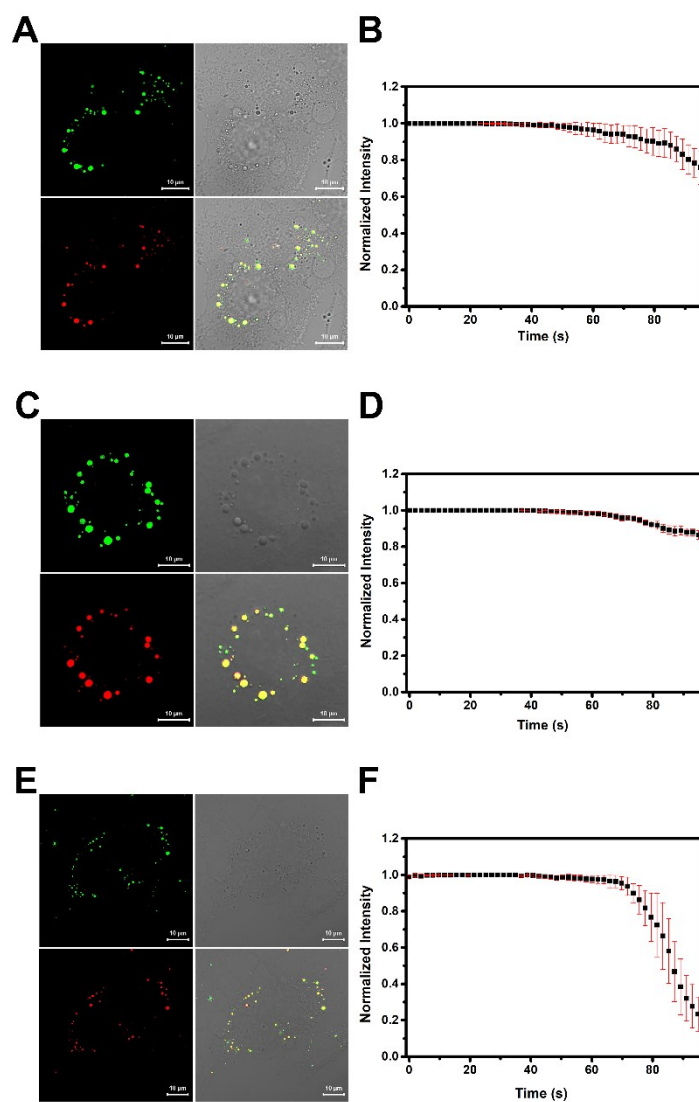

**Fig. S10.** (A, C, E) CLSM images of HepG2 cells incubated with compounds (**CHPC**, **CPP** and **CHP** respectively) and Nile red, Compound Channel,  $\lambda_{\text{ex}}=405$  nm. Nile red channel,  $\lambda_{\text{ex}}=543$  nm. (B, D, F) Fluorescent signal change of HepG2 cells stained with compounds (**CHPC**, **CPP** and **CHP** respectively) under continuous laser irradiation

## NMR DATA

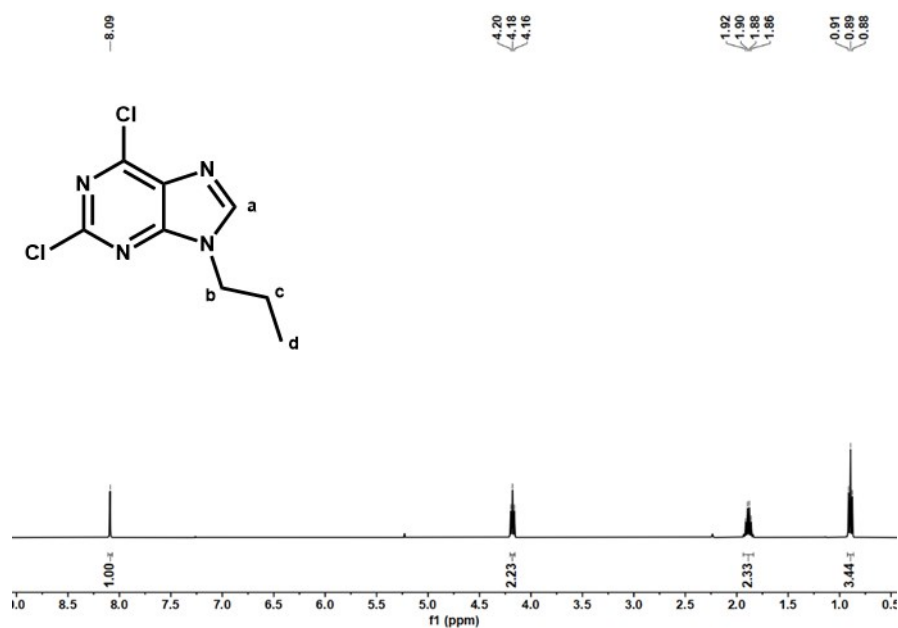

Fig. S11  $^1\text{H}$  NMR of Compound 2 in CDCl<sub>3</sub>

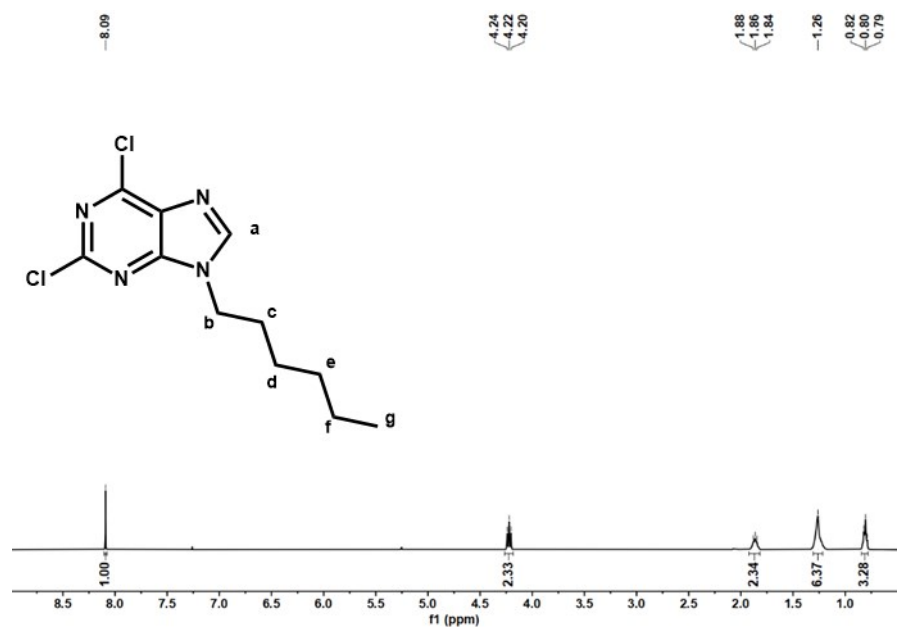

Fig. S12  $^1\text{H}$  NMR of Compound 3 in CDCl<sub>3</sub>

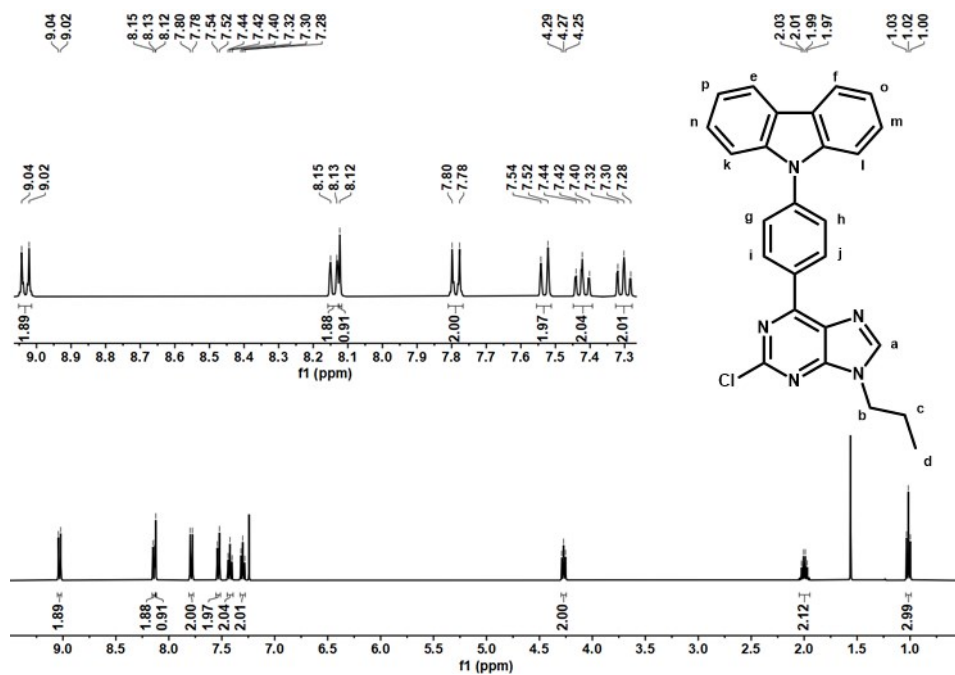

**Fig. S13**  $^1\text{H}$  NMR of Compound CPPC in  $\text{CDCl}_3$

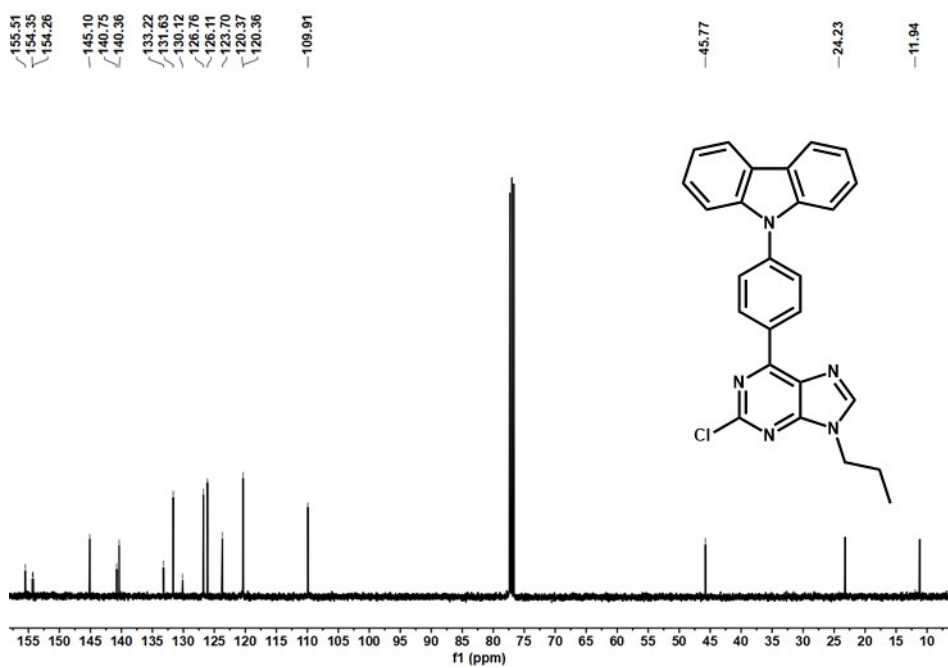

**Fig. S14**  $^{13}\text{C}$  NMR of Compound CPPC in  $\text{CDCl}_3$

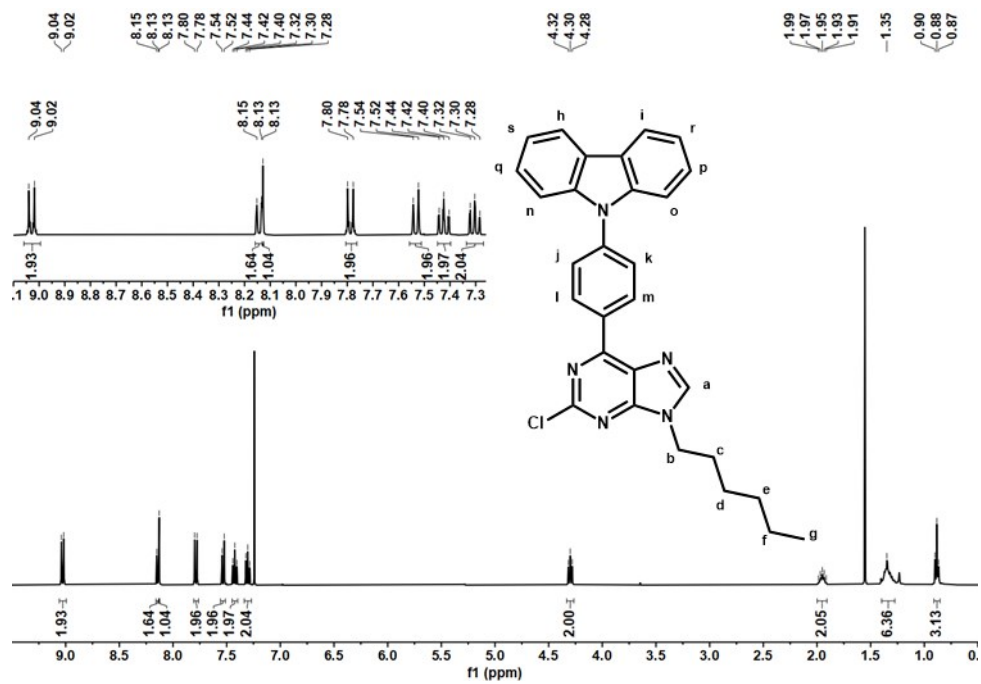

**Fig. S15** <sup>1</sup>H NMR of Compound CHPC in CDCl<sub>3</sub>

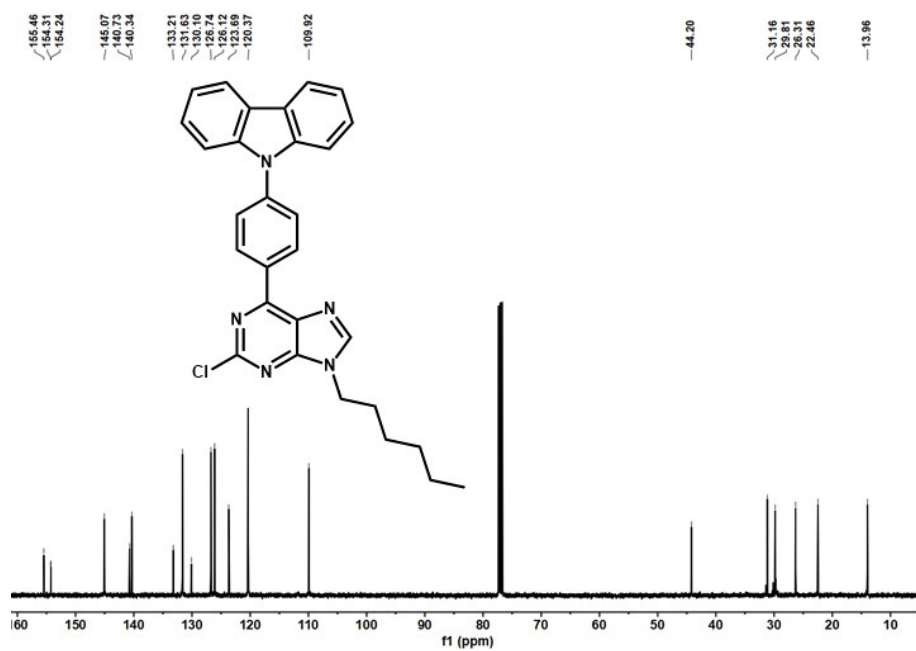

**Fig. S16** <sup>13</sup>C NMR of Compound CHPC in CDCl<sub>3</sub>



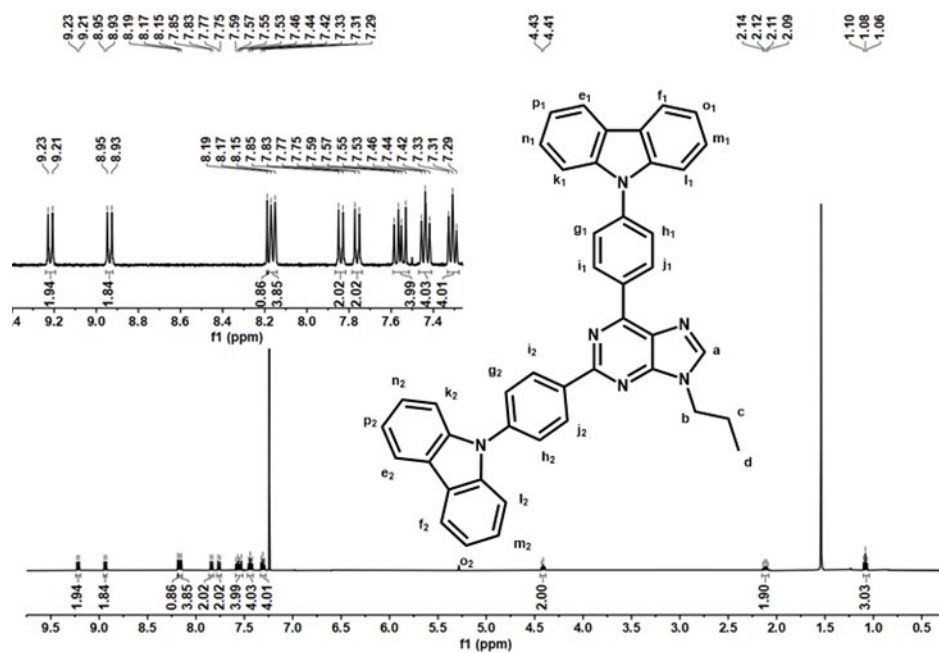

Fig. S17 <sup>1</sup>H NMR of Compound CPP in CDCl<sub>3</sub>

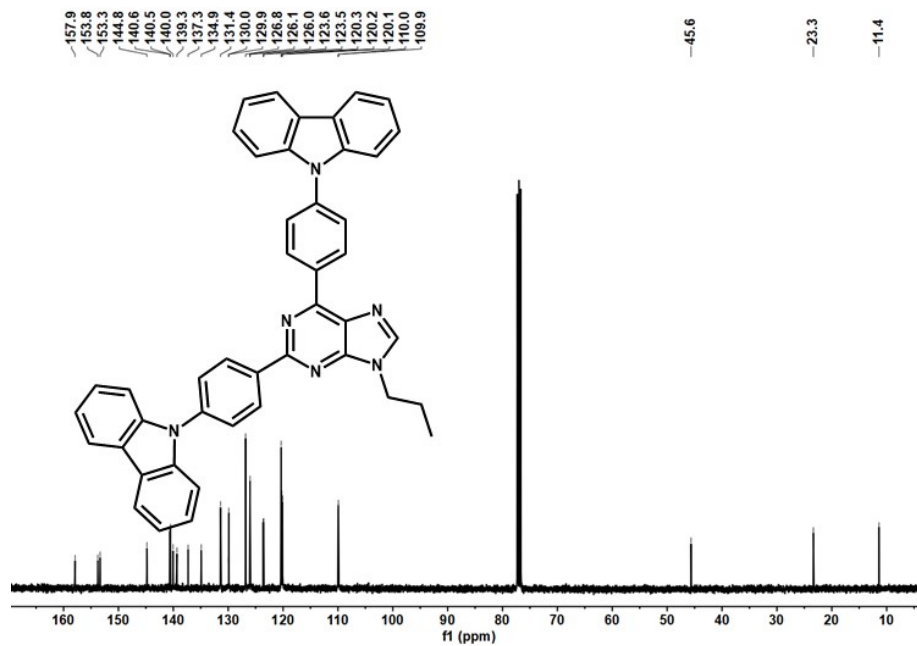

Fig. S18 <sup>13</sup>C NMR of Compound CPP in CDCl<sub>3</sub>

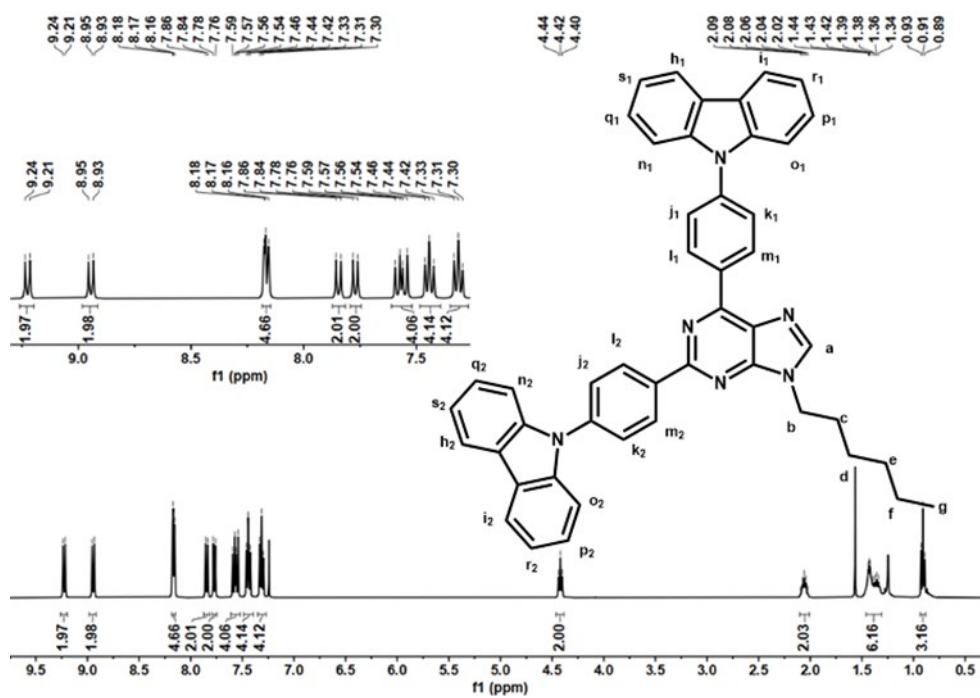

**Fig. S19** <sup>1</sup>H NMR of Compound **CHP** in CDCl<sub>3</sub>

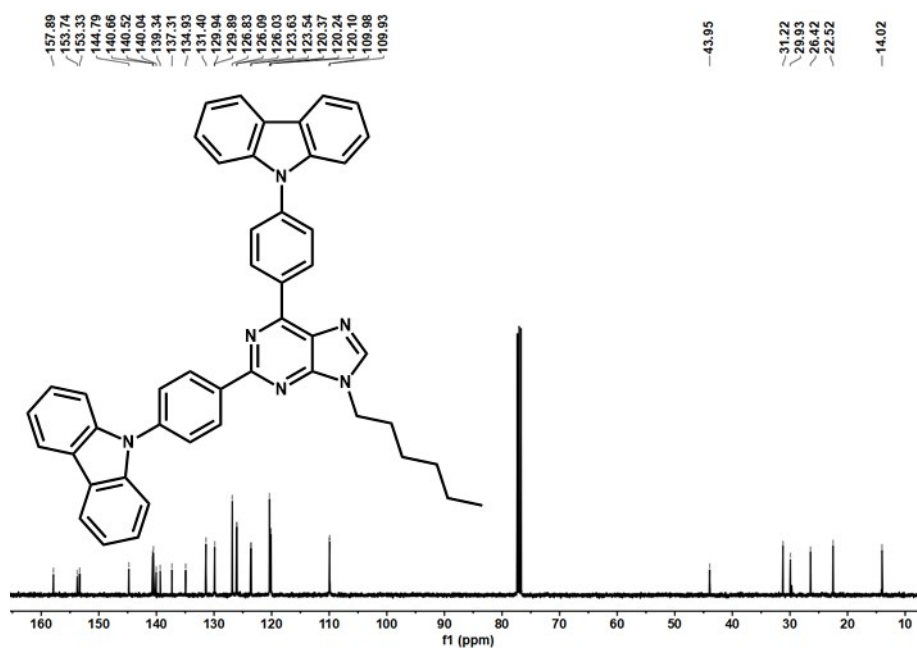

**Fig. S20** <sup>13</sup>C NMR of Compound **CHP** in CDCl<sub>3</sub>

## ESI-MS Data

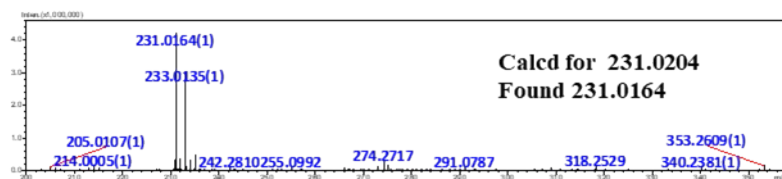

Fig. S21 ESI-MS of Compound 2

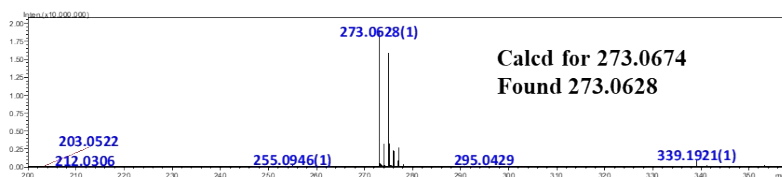

Fig. S22 ESI-MS of Compound 3

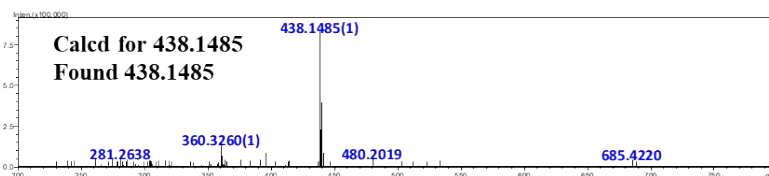

Fig. S23 ESI-MS of Compound CPPC.

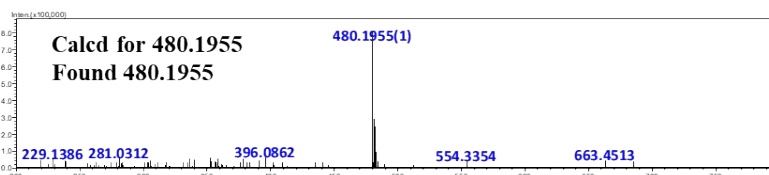

Fig. S24 ESI-MS of Compound CHPC.

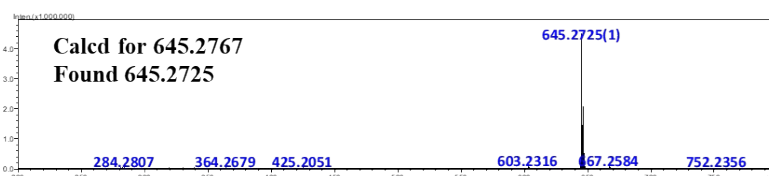

Fig. S24 ESI-MS of Compound CPP.

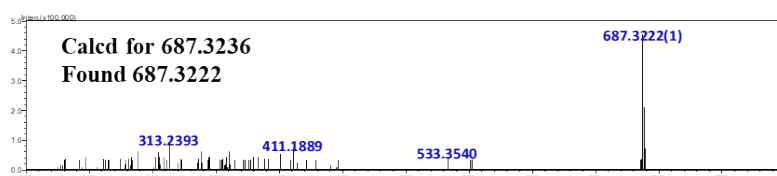

Fig. S25 ESI-MS of Compound CHP.

## References

1. L. Shi, K. Li, L. L. Li, S. Y. Chen, M. Y. Li, Q. Zhou, N. Wang and X. Q. Yu, *Chem. Sci.*, 2018, **9**, 8969-8974.
2. S.M., Bonesi, M.A., Ponce, and R., Erra-Balsells, *J. Heterocycl. Chem.*, 2004, **41**, 161-171.
